# Supplementary material
Source: PubMed Central journal article supplement (PMC5047665)
Supplement: NIHMS818560-supplement-SI.pdf [file NIHMS818560-supplement-SI.pdf]

*Supporting Information for*

# **Intermolecular Structural Change for Thermo-Switchable Polymeric Photosensitizer**

*Wooram Park,<sup>1</sup> Sin-Jung Park,<sup>2,#</sup> Soojeong Cho,<sup>1</sup> Heejun Shin,<sup>2</sup> Young-Seok Jung,<sup>2</sup>*

*Byeongdu Lee,<sup>4,\*</sup> Kun Na,<sup>2,\*</sup> and Dong-Hyun Kim<sup>1,3,\*</sup>*

<sup>1</sup>Department of Radiology, Feinberg School of Medicine, Northwestern University, Chicago, IL, 60611, USA, <sup>2</sup>Center for Photomedicine, Department of Biotechnology, The Catholic University of Korea, Bucheon-si, Gyeonggi-do, 14662, Republic of Korea, <sup>3</sup>Robert H. Lurie Comprehensive Cancer Center, Chicago, IL, 60611, USA, <sup>4</sup>X-Ray Science Division, Argonne National Laboratory, 9700 S Cass Ave, Argonne, IL, 60439, USA.

**Current Address:** <sup>#</sup>Department of Biopharmaceutical Sciences, College of Pharmacy, University of Illinois, Chicago, IL 60612, USA.

**\*Corresponding Author:** Dr. Byeongdu Lee (blee@aps.anl.gov), Prof. Kun Na (kna6997@catholic.ac.kr), and Prof. Dong-Hyun Kim (dhkim@northwestern.edu).

## ***Experimental section***

**Materials:** Pheophorbide-a (PPb-a) was purchased from Frontier Scientific (Logan, UT, USA). hydroxypropyl cellulose (HPC, average  $M_w$ : ~80,000, average  $M_n$ : ~10,000), *N,N'*-Dicyclohexylcarbodiimide (DCC), 4-(Dimethylamino)pyridine (DMAP), *N,N*-Dimethylformamide (DMF), and Dimethyl Sulfoxide (DMSO) were purchased from Sigma-Aldrich (Milwaukee, WI, USA). These chemical products were used without further purification process.

**Synthesis of a temperature-responsive polymeric photosensitizer (T-PPS):** T-PPS was synthesized via conventional carbodiimide reaction.<sup>1</sup> HPC (0.2 g, 2.50  $\mu$ mol) was dissolved in 5 mL of DMF and stirred for 4 h. Then, mixture of PPb-a (2.5 mg, 4.22  $\mu$ mol), DCC (12.5 mg, 60.60  $\mu$ mol), and DMAP (12.5 mg, 102.30  $\mu$ mol) in 5 mL of DMF was added to the as-prepared HPC solution and reacted for 24 h at room temperature. After reaction, the reactant was precipitated in cold diethyl ether (0.2 L) and repeated three times. The resultant was dialyzed against deionized water (DW) using a cellulose membrane (molecular cut-off, 1000 Da, Spectrum Laboratories, Rancho Dominguez, CA, USA) to remove unreacted impurities. The final products were lyophilized and stored in refrigerator at -20 °C. Chemical structure of the as-synthesized T-PPS was analyzed by <sup>1</sup>H-NMR spectroscopy (Bruker 500 MHz NMR Spectrometer, Bruker, Germany). <sup>1</sup>H-NMR (DMSO-*d*<sub>6</sub>, 500 MHz):  $\delta$  4.43 (m, H1 of HPC), 3.04-4.00 (m, H2-8 of HPC), 2.27 (s, 17<sup>1</sup>-H<sub>2</sub> of PPb-a), 2.04 (s, H17<sup>2</sup>-H<sub>2</sub> of PPb-a), 1.05 (m, H9 of HPC). The degrees of substitution (DS) of PPb-a of the T-PPS was estimated by the relative peak intensities between the protons of HPC ( $\delta$  4.43, H1 of HPC) and the protons of PPb-a ( $\delta$  2.04, H17<sup>2</sup>-H<sub>2</sub> of PPb-a) in the <sup>1</sup>H-NMR spectrum of T-PPS (Figure S2). To double-check the DS of PPb-a of the T-PPS, absorbance spectra of T-PPS was measured in DMSO at 413 nm using a UV-Vis spectrophotometer (UV-2450, Shimadzu, Japan).

**Optical transmittance change of the T-PPS at different temperatures:** The T-PPS (10 mg/mL) was

dissolved in DW. The optical transmittance change of the solution was measured at 500 nm of wavelength using UV–Vis spectrometer (UV-1601, Shimadzu, Japan) with increasing temperature. The transmittance value was normalized to 100 % with the transmittance of the sample at 35 °C.

**Transmission electron microscopy (TEM) measurement:** TEM images were obtained from filtered (0.45 µm syringe filter) sample solutions (HPC or T-PPS, 1 mg/mL). Small droplets (~10 µL) of the solution were deposited onto 400 mesh formvar-coated copper TEM grids (Ted Pella Inc., Redding, CA, USA). The samples were dried in a vacuum oven at 45 °C for 2 hr. TEM images were recorded using an FEI Tecnai G2 Spirit transmission electron microscope (FEI, Hillsboro, OR, USA) at 60 kV.

**Fluorescent intensity change of the T-PPS at different temperatures:** The T-PPS (10 mg/mL) was dissolved in DW. The fluorescent intensity change of the solution was measured at excitation (670 nm) and emission (700 nm) wavelength using fluorescence spectroscopy (RF-5301; Shimadzu, Japan) with increasing temperature.

**Singlet oxygen generation (SOG) of the T-PPS at different temperatures:** The SOG from T-PPS was quantitatively measured using a fluorescence probe (*i.e.*, singlet oxygen sensor green (SOSG, Molecular Probes, Eugene, OR, USA)). One mL of the T-PPS solutions (10 mg/mL, in DW) at different temperature were mixed with SOSG (2.0 mM, 100 µL) and then irradiated with a 670 nm laser source (fiber optic-coupled laser system, Laser Lab®, Korea) at 5 mW/cm<sup>2</sup> intensity for 4 minutes. After laser-irradiation, the fluorescent intensity change of the solution was measured at excitation (494 nm) and emission (534 nm) wavelength using the fluorescence spectroscopy.

**Dynamic light scattering measurement at different temperature:** Hydrodynamic size of the T-PPS (10 mg/mL, in DW) at different temperature was measured using a Zetasizer Nano ZS (Nano-ZS, Malvern Instruments, Ltd., UK).

**Small-angle X-ray scattering (SAXS) measurement<sup>2</sup>:** The SAXS measurements were performed with X-ray energy of 14 keV at the 12-ID-B station in the Advanced Photon Source of the Argonne National Laboratory (Lemont, IL, USA). A Pilatus 2M detector (Dectris Ltd., Baden, Switzerland) was used to acquire scattering data with exposure times typically in a range of 0.1–1.0 s. SAXS experiments are performed both for solution and solid samples with varying temperature. Each of T-PPS solution sample (10 mg/mL, in DW) was prepared in an aluminum pan and sealed. Solid samples (approximately 20 mg) were prepared between a pair of Kapton tape. They were placed on the THMS 600 heating stage (Linkam Scientific Instruments, Tadworth, Surrey, UK) modified for X-ray experiment. The temperature was varied from 30 to 60 °C with a rate of 1 °C/min and dwelling time of 5 min in each run end.

***In vitro* cytotoxicity test:** PANC-2 (human pancreatic cancer) cells were obtained from the American Type Culture Collection (ATCC; Manassas, VA, USA) and cultured in Dulbecco's modified Eagle's medium (DMEM; Gibco, Carlsbad, CA, USA). For photo-cytotoxicity study at different temperature, PANC-2 cells ( $2 \times 10^5$  cells/well) were seeded in 35 mm<sup>2</sup> cell culture dishes and incubated (37 °C, 5% CO<sub>2</sub>) for 12 h. After rinsing twice with Dulbecco's phosphate buffer saline (DPBS; Invitrogen Corp., Carlsbad, CA, USA), the cells were treated with the T-PPS dissolved in the DMEM cell media for 4 h and then irradiated with the 670 nm laser. Finally, to access an additional cytotoxicity effect of hyperthermia, the cells were further incubated at either 37 °C or 45 °C for 1 h. After 24 h incubation at normal condition, cell viability was evaluated with both a Cell Counting Kit-8 (CCK-8; Dojindo Molecular Technologies, Gaithersburg, MD, USA) and a LIVE/DEAD two-color fluorescence assay (Invitrogen, Carlsbad, CA, USA), according to the manufacturer's instruction.

***In vivo* fluorescent imaging:** All procedures were approved by the Institutional Animal Care and Use Committee (IACUC) of the Catholic University of Korea (Republic of Korea). Five-week-old male BALB/c nude mice (Orient Bio, Seongnam, Korea) were used for the imaging study. Either free PPb-a

(Control) or T-PPS (injection dose; equivalent to 0.25  $\mu\text{g}$  of PPb-a) was subcutaneously injected into the left and right flank regions of BALB/c nude mice, respectively. After the injection, left flank region was treated heat treatment with 45 °C for 5 min by using a pre-heated gel pack (Moore Medical Corp, New Britain, CT, USA). The fluorescent images were taken by *in vivo* image station (IVIS, Kodak, New Haven, CT, USA).

**Statistical analysis:** Data are expressed as the mean  $\pm$  standard deviation (SD). Student's t-test was performed with SigmaPlot software (Version 10, Systat, Chicago, IL, USA) for statistical analyses.

**Table S1.** Characterization of T-PPS

| Sample       | Conjugates           | Yield (wt%) <sup>a)</sup> | DS of PPb-a <sup>b)</sup> | DS of PPb-a <sup>c)</sup> | LCST <sup>d)</sup> [°C] |
|--------------|----------------------|---------------------------|---------------------------|---------------------------|-------------------------|
| <b>HPC</b>   | HPC                  | -                         | -                         | -                         | 42.8 ± 0.7              |
| <b>T-PPS</b> | PPb-a conjugated HPC | 80 ± 5.0                  | 1.0 ± 0.1                 | 1.1 ± 0.1                 | 43.4 ± 0.6              |

<sup>a)</sup>Yield (wt%) = weight of obtained compounds (PPb-a conjugated HPC, g) / weight of added initial materials (HPC + PPb-a, g) × 100 (n=3).

<sup>b)</sup>Degree of substitution (DS) of PPb-a molecules per one HPC molecule, calculated by <sup>1</sup>H-NMR analysis (Figure S2, n=3).

<sup>c)</sup>Degree of substitution (DS) of PPb-a molecules per one HPC molecule, calculated by comparing the absorption value to the standard curve (Figure S14, n=3).

<sup>d)</sup>Lower critical solution temperature (LCST) values of T-PPS were determined at the temperatures showing an optical transmittance (at 500 nm) of 50% by UV-vis spectrophotometer (Figure 1(a)).

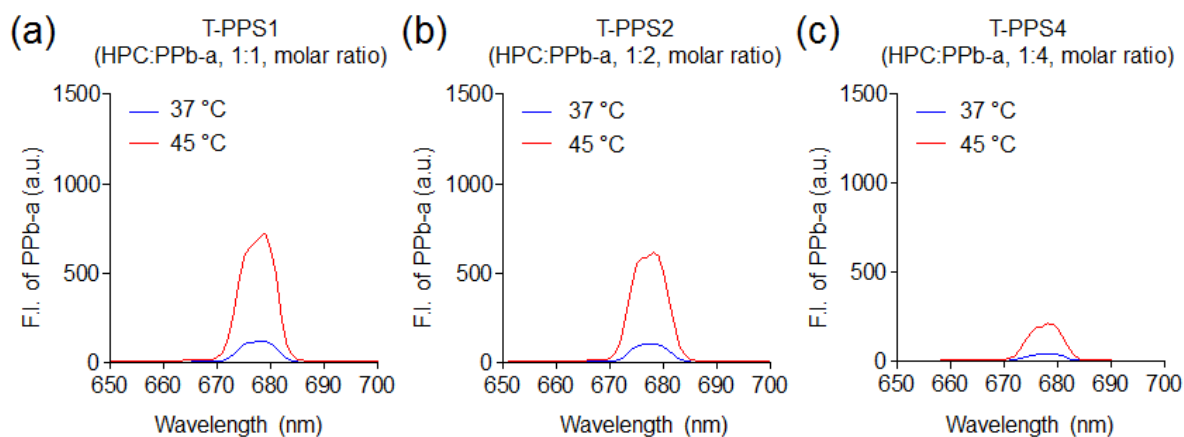

**Figure S1.** Fluorescent emission spectra of T-PPS with different PS conjugation ratio at different temperature conditions. The fluorescent emission spectra of (a) T-PPS1 (with 1:1 molar ratio of HPC to PPb-a), (b) T-PPS2 (with 1:2 molar ratio of HPC to PPb-a), and (c) T-PPS4 (with 1:4 molar ratio of HPC to PPb-a) were measured at 37 and 45 °C. As increasing PS conjugation ratio, maximum fluorescent emission both at 37 and 45 °C was decrease, which could be attributed to self-quenching of the PSs conjugated in the HPC polymer chain.<sup>3</sup>

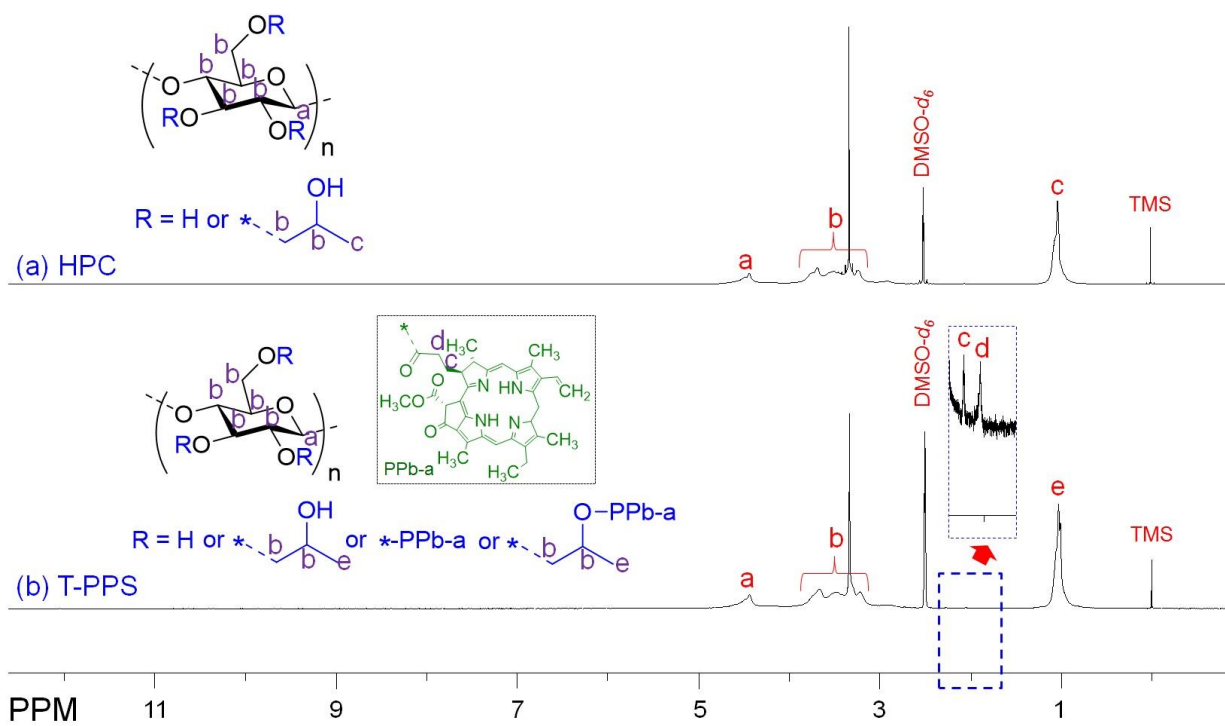

**Figure S2.**  $^1\text{H-NMR}$  analysis of (a) native HPC and (b) T-PPS in  $\text{DMSO-}d_6$ .



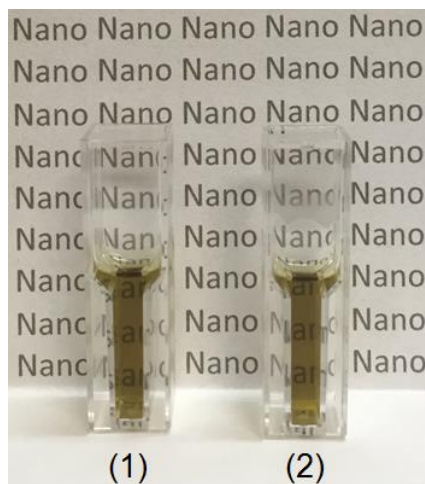

**Figure S3.** Photograph of T-PPS aqueous solution (10 mg/mL in water) after cooling down for 30 minutes at room temperature: T-PPS solution without (1) or with (2) heating.

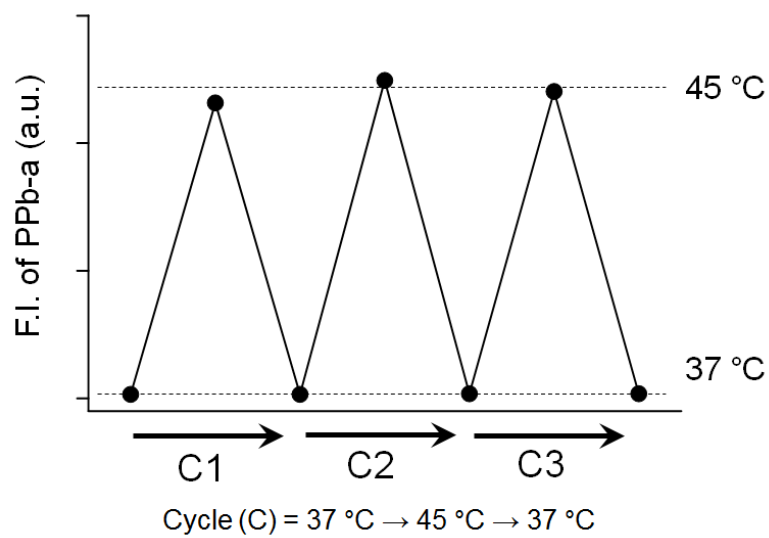

**Figure S4.** Reversible change of fluorescent intensity of T-PPS aqueous solution (10 mg/mL) between at 37 °C and at 45 °C.

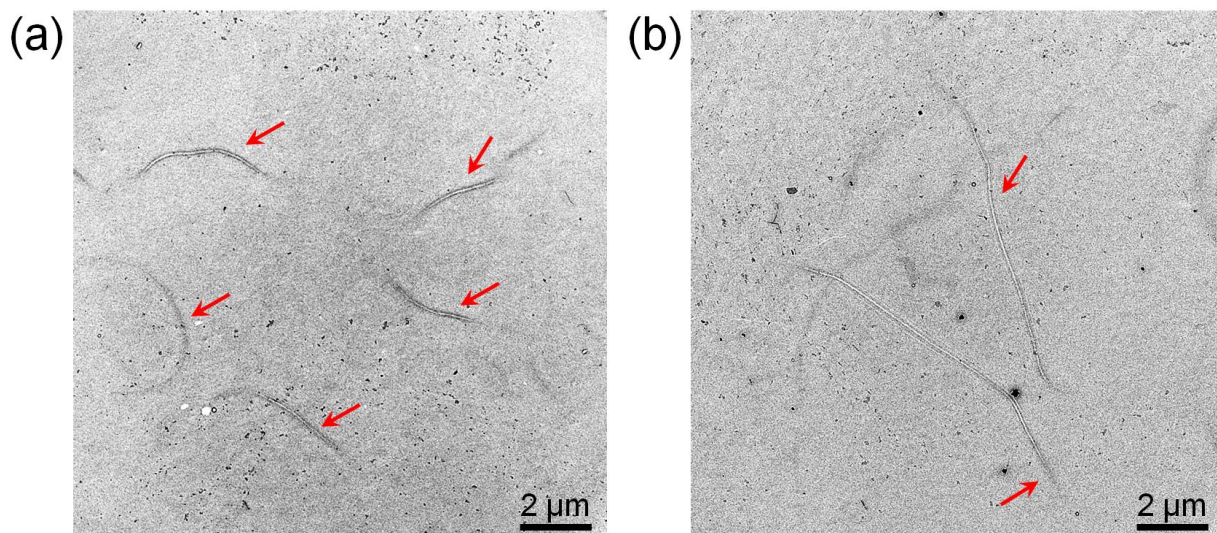

**Figure S5.** TEM image of (a) native HPC and (b) T-PPS sample dried at 45 °C on a Formvar-coated copper grid. The scale bar presents 2  $\mu\text{m}$ . Fibril structure (red arrow) was obviously observed both in native HPC and T-PPS sample at the dehydrated condition.

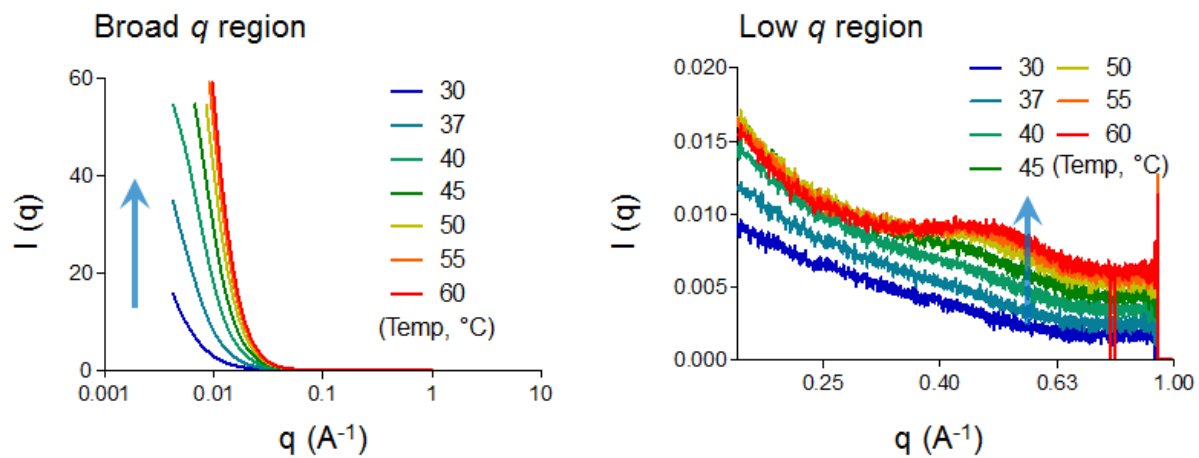

**Figure S6.** SAXS curve for native HPC in aqueous solution (10 mg/mL) at different temperature (from 30 to 60 °C).

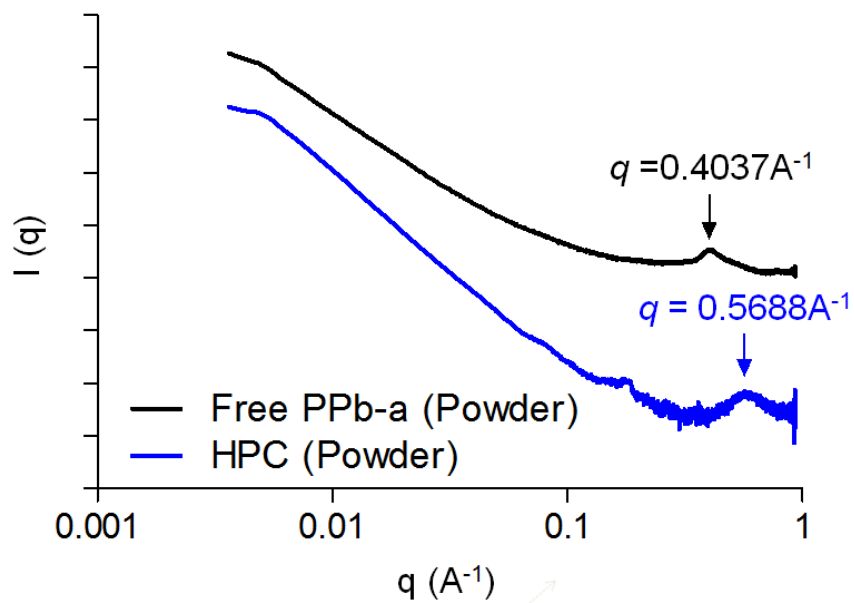

**Figure S7.** SAXS curve for free PPb-a powder and HPC powder (embedded in kapton film) at room temperature (25 °C). Peaks for PPb-a and HPC are at  $q = 0.4037 \text{\AA}^{-1}$  and  $0.5688 \text{\AA}^{-1}$ , respectively, corresponding to  $d$ -spacings of 1.56 and 1.1 nm respectively.

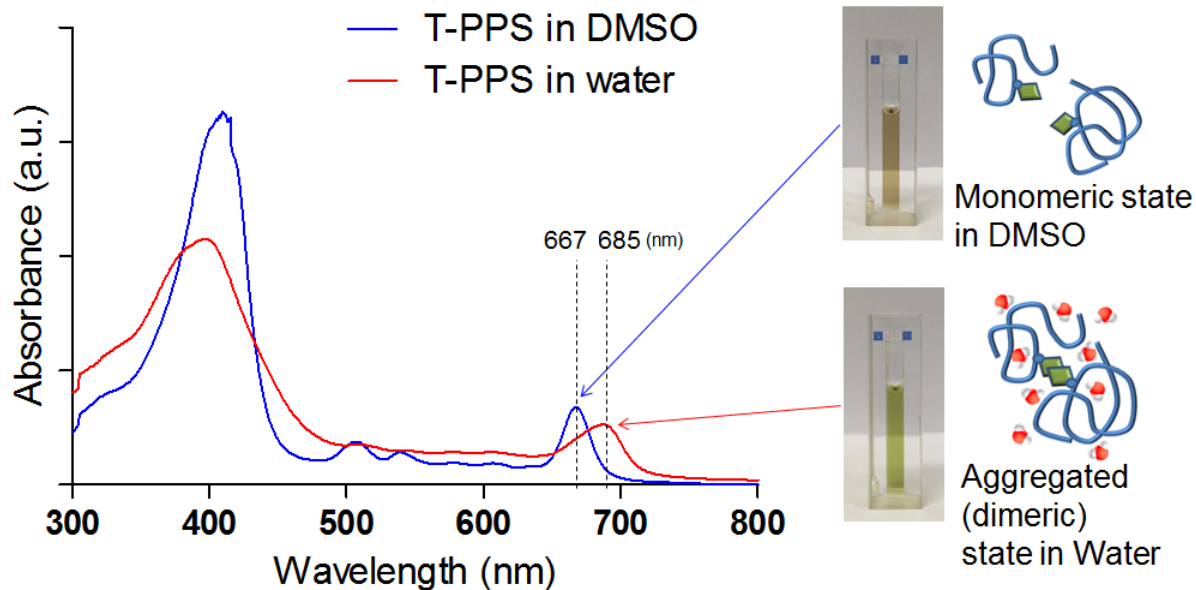

**Figure S8.** Light absorption spectra of T-PPS (10 mg/mL) at room temperature in water and DMSO, respectively (Inset: schematic illustration of inter-molecular structural change of T-PPS in different solvent media). The absorption band at 667 nm is characteristic for the corresponding the PPb-a monomer, while the band at 685 nm is assigned to absorption of the PPb-a dimer.<sup>4</sup>

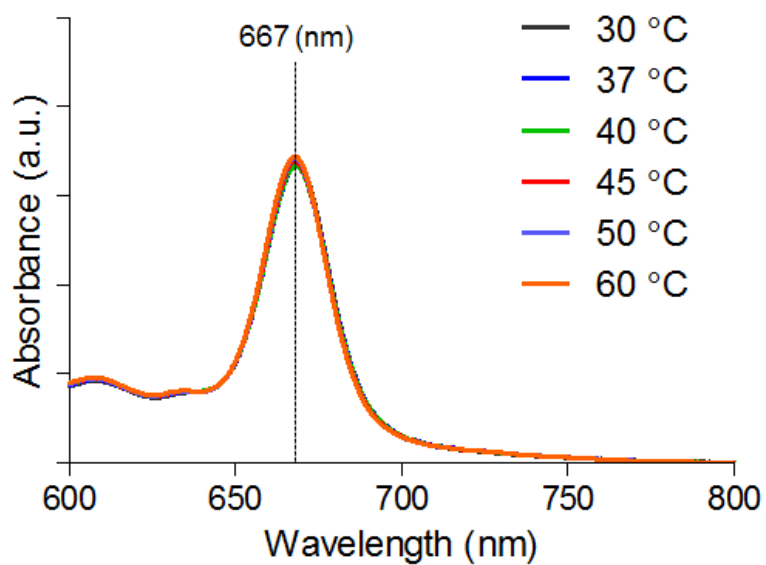

**Figure S9.** Light absorption spectra of T-PPS (10 mg/mL) as a function of temperature in DMSO.

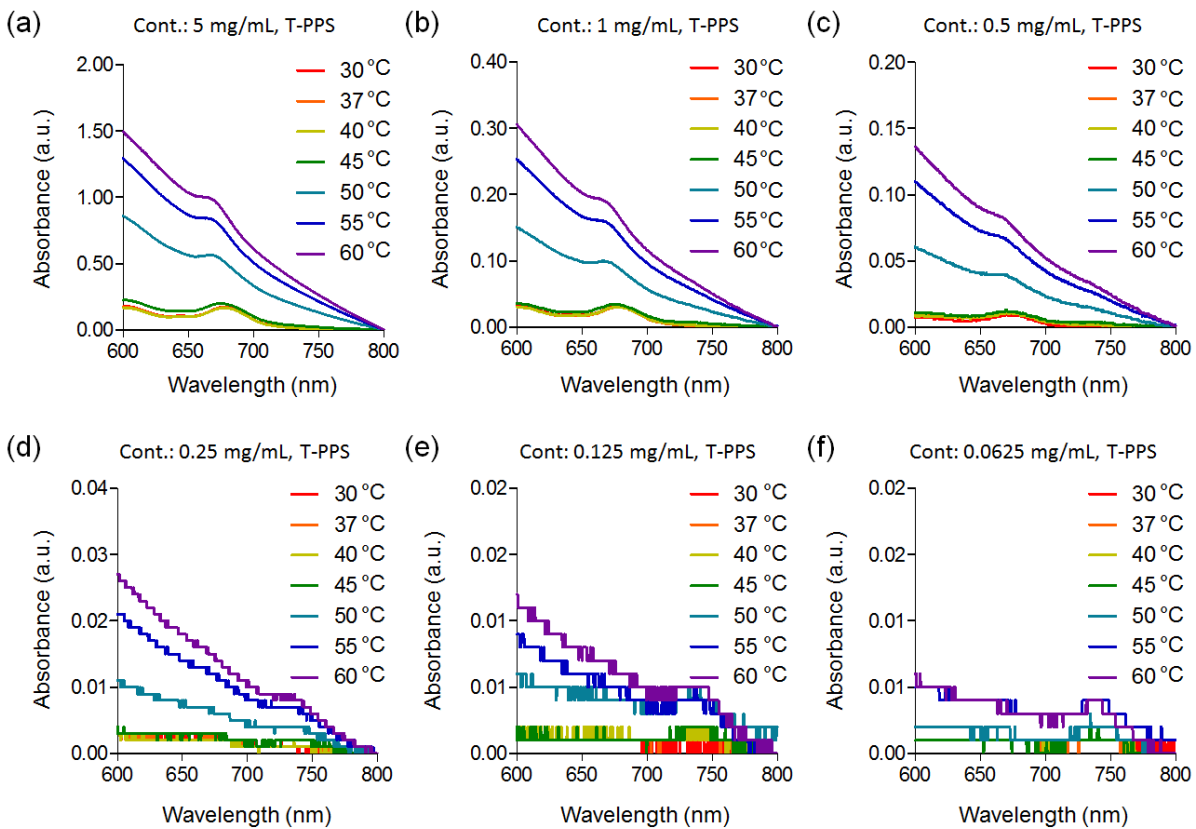

**Figure S10.** Temperature-dependent light absorption spectra change of different concentration of T-PPS in water.



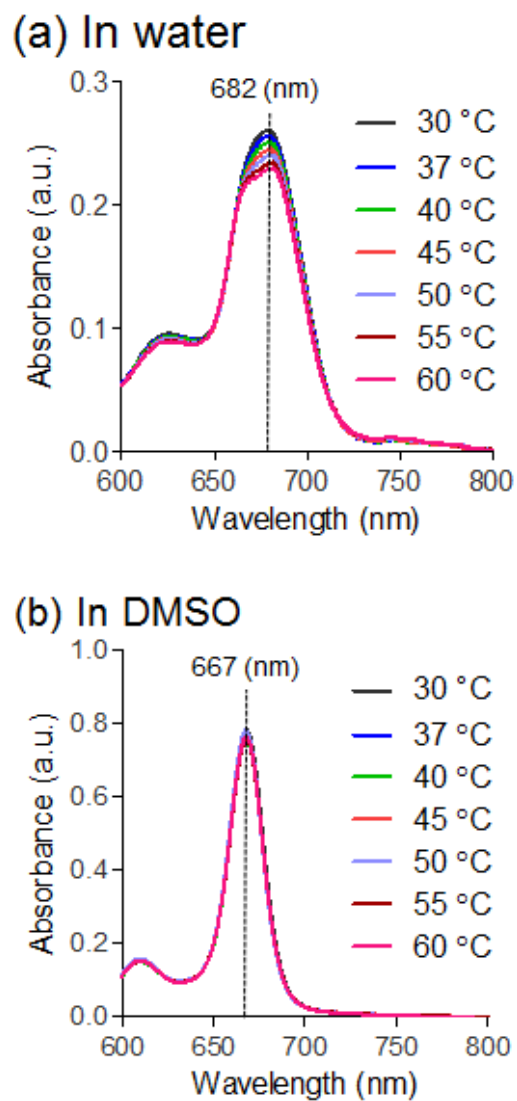

**Figure S11.** Light absorption spectra of free PPb-a (2  $\mu\text{g/mL}$ ) as a function of temperature in (a) water and (b) DMSO, respectively. Although the characteristic  $Q_y$ -band (at 682 nm) for aggregation was also observed in water due to their strong intermolecular hydrophobic interaction,<sup>5</sup> temperature-induced  $Q_y$  band shift was not observed in both water and DMSO.

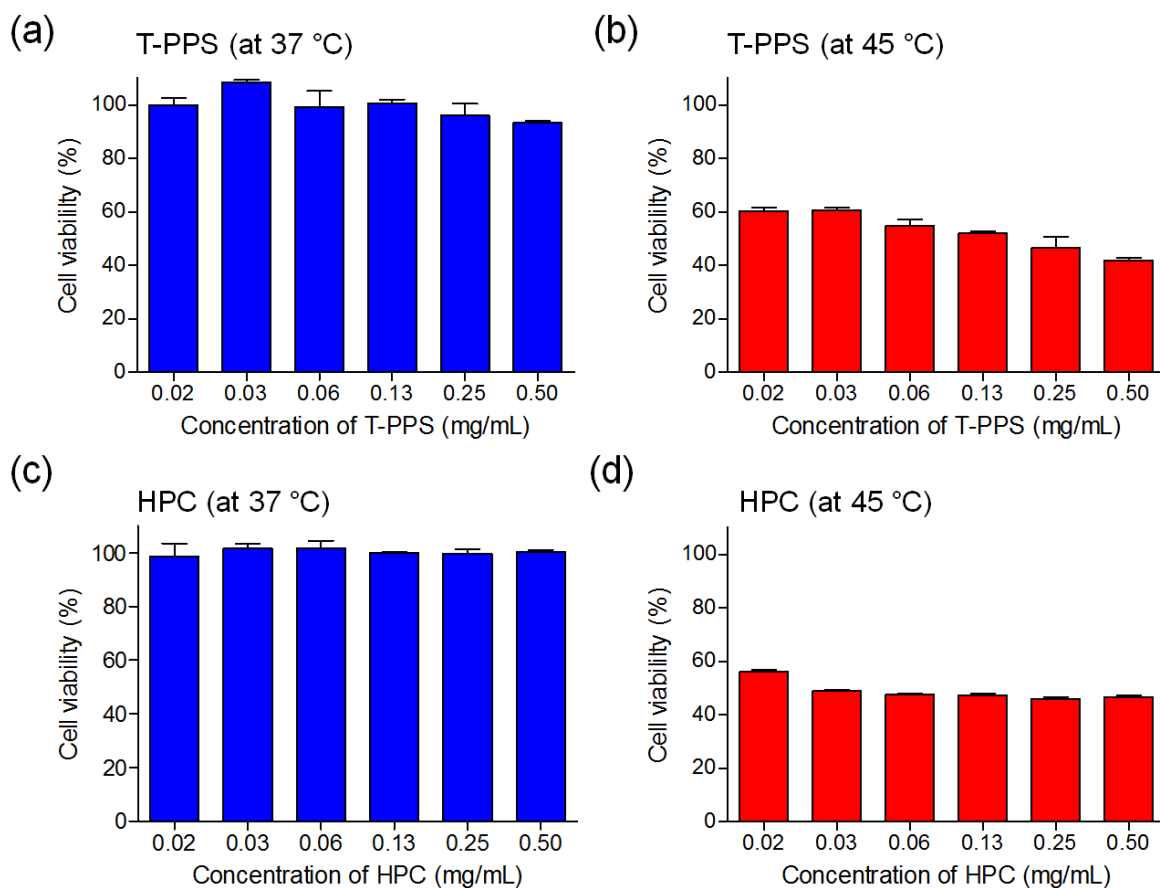

**Figure S12.** *In vitro* cytotoxicity of T-PPS and HPC against PANC2 cells. PANC2 cells were treated with either T-PPS or native HPC in various concentrations at physiological (37 °C) or hyperthermia (45 °C) temperature.

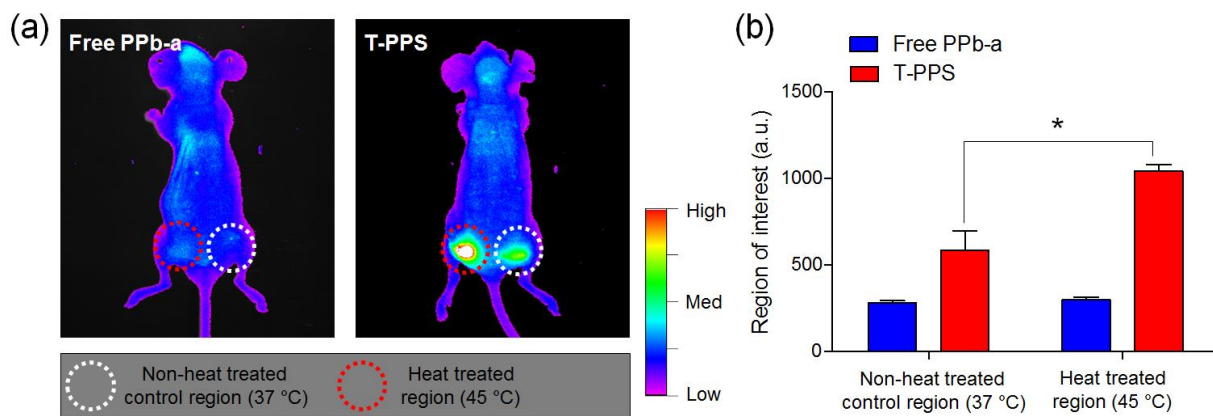

**Figure S13.** *In vivo* fluorescent imaging of heat-induced activation of T-PPS. (a) *In vivo* fluorescent image of free PPb-a or T-PPS treated BALB/c nude mice after heat treatment. (b) Quantitative analysis of the fluorescent signals obtained from *in vivo* fluorescent image. The fluorescent signal was quantified by measurement of region of interest (ROI) value for the injected sites ( $*p < 0.05$ ,  $n=3$ ).

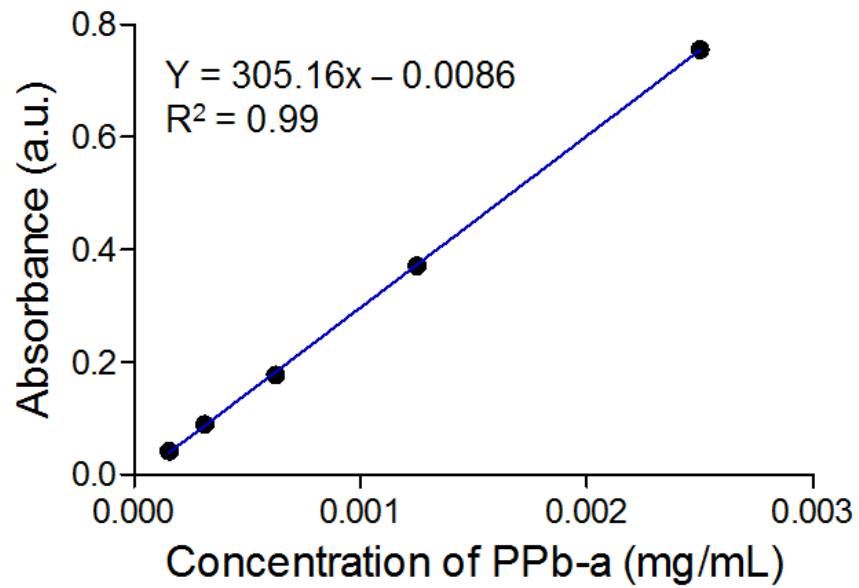

**Figure S14.** A linear regression curve obtained by plotting the absorbance (at 413nm) of free PPb-a at different concentration.

### ***References for SI***

1. (a) Park, W.; Bae, B.-c.; Na, K., *Biomaterials* **2016**, *77*, 227; (b) Li, F.; Bae, B.-c.; Na, K., *Bioconjug. Chem.* **2010**, *21*, 1312.
2. (a) Li, T.; Zan, X.; Winans, R. E.; Wang, Q.; Lee, B., *Angew. Chem. Int. Ed.* **2013**, *52*, 6638; (b) Li, T.; Zan, X.; Sun, Y.; Zuo, X.; Li, X.; Senesi, A.; Winans, R. E.; Wang, Q.; Lee, B., *Langmuir* **2013**, *29*, 12777.
3. (a) Choi, Y.; Weissleder, R.; Tung, C.-H., *Cancer Res.* **2006**, *66*, 7225; (b) Bae, B.-c.; Na, K., *Biomaterials* **2010**, *31*, 6325.
4. Eichwurz, I.; Stiel, H.; Röder, B., *J. Photochem. Photobiol. B.* **2000**, *54*, 194.
5. Tanielian, C.; Wolff, C.; Esch, M., *J. Phys. Chem.* **1996**, *100*, 6555.
